# Supplementary material for: Adsorption as a remediation technology for short-chain per- and polyfluoroalkyl substances (PFAS) from water – a critical review
Source: Royal Society of Chemistry journal article supplement (doi:10.1039/d2ew00721e), 2022-12-08
Supplement: d2ew00721e1.pdf [file d2ew00721e1.pdf]

Supporting Information

**Adsorption as a Remediation Technology for Short-Chain Per- and Polyfluoroalkyl  
Substances (PFAS) from Water - A Critical Review**

Hajar Smaili<sup>1</sup>, Carla Ng<sup>1,2\*</sup>

<sup>1</sup>Department of Civil & Environmental Engineering, University of Pittsburgh, Pittsburgh, PA,

15261

<sup>2</sup>Department of Environmental and Occupational Health, University of Pittsburgh, Pittsburgh,

PA, 15261

\*Corresponding author: [carla.ng@pitt.edu](mailto:carla.ng@pitt.edu)

Table S1. List of Acronyms

|                    |                                                           |
|--------------------|-----------------------------------------------------------|
| AC                 | Activated carbon                                          |
| ADONA              | Dodecafluoro-3H-4,8-dioxanoate                            |
| AFFF               | Aqueous film-forming foams                                |
| APANF              | Animated polyacrylonitrile fiber                          |
| CDP                | Cyclodextrin polymer                                      |
| CMC                | Critical micelle concentration                            |
| CNT                | Carbon nanotube                                           |
| CTAB               | Cetyltrimethylammonium bromide                            |
| DOM                | Dissolved organic matter                                  |
| DWTP               | Drinking water treatment plant                            |
| FASA               | Perfluoroalkyl sulfonamides                               |
| GAC                | Granular activated carbon                                 |
| MAC                | Magnetic activated carbon                                 |
| MIEX               | Magnetic ion-exchange                                     |
| MIP                | Molecularly imprinted polymer                             |
| MMFRS              | Melamine-formaldehyde resin microspheres                  |
| MWCNT              | Multiwalled carbon nanotube                               |
| N-EtFOSAA          | N-Ethylperfluorooctanesulfonamidoacetic Acid              |
| OF                 | Organic framework                                         |
| PAC                | Powdered activated carbon                                 |
| PANT               | Polyaniline nanotubes                                     |
| PEI- <i>f</i> -CMC | Poly(ethylenimine)-functionalized cellulose microcrystals |
| PFBA               | Perfluorobutanoic acid                                    |
| PFBS               | Perfluorobutane sulfonic acid                             |
| PFCA               | Perfluoroalkyl carboxylic acid                            |
| PFDA               | Perfluorodecanoic acid                                    |
| PFDoDA             | Perfluorododecanoic acid                                  |
| PFECA              | Perfluoroether carboxylic acid                            |
| PFESA              | Perfluoroether sulfonic acid                              |
| PFHpA              | Perfluoroheptanoic acid                                   |

|             |                                               |
|-------------|-----------------------------------------------|
| PFHpS       | Perfluoroheptanesulfonic acid                 |
| PFHxA       | Perfluorohexanoic acid                        |
| PFHxS       | Perfluorohexane sulfonic acid                 |
| PFNA        | Perfluorononanoic acid                        |
| PFNS        | Perfluorononane sulfonic acid                 |
| PFOA        | Perfluorooctanoic acid                        |
| PFOS        | Perfluorooctane sulfonic acid                 |
| PFOSA       | Perfluorooctane sulfonamide                   |
| PFPeA       | Perfluoropentanoic acid                       |
| PFPeS       | Perfluoropentane sulfonic acid                |
| PFPHpA      | Perfluoroheptanoic acid                       |
| PFPrA       | Perfluoropropionic acid                       |
| PFPrS       | Perfluoropropane sulfonic acid                |
| PFSA        | Perfluoroalkane sulfonic acid                 |
| PFTeDA      | Perfluorotetradecanoic acid                   |
| PFTrDA      | Perfluorotridecanoic acid                     |
| PFUnDA      | Perfluoroundecanoic acid                      |
| RO          | Reverse osmosis                               |
| TFMAA       | Trifluoromethyl acrylic acid                  |
| ULS         | University library system                     |
| USEPA       | United States Environmental Protection Agency |
| WWTP        | Wastewater treatment plant                    |
| $\beta$ -CD | $\beta$ -cyclodextrin                         |

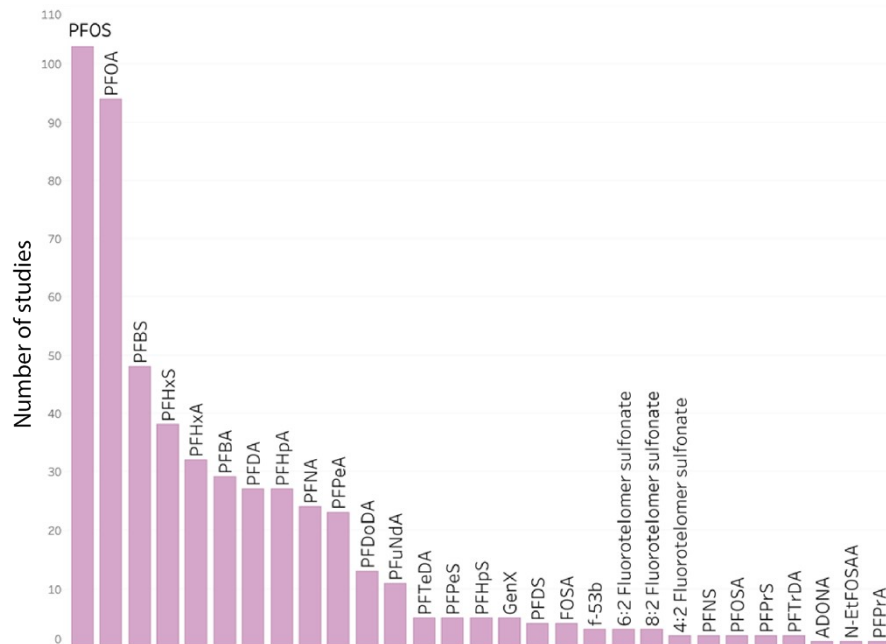

Fig S1. Distribution of all PFAS included in this review

**Table S2.** Summary of studies reporting metrics not convertible to percent removal (reference numbers refer to reference list in main text).

| Treated PFAS | Studied sorbent | Reported metric                      | Reported value | Reference                    |
|--------------|-----------------|--------------------------------------|----------------|------------------------------|
| PFOS         | Alumina         | Capacity in $\mu\text{g}/\text{m}^2$ | 0.252          | Wang & Shih, 2011 (ref. 125) |
| PFOA         | Alumina         | Capacity in $\mu\text{g}/\text{m}^2$ | 0.157          |                              |
| PFOS         | Boehmite        | Capacity in $\mu\text{g}/\text{m}^2$ | 0.877          | Wang et al., 2012 (ref. 123) |
| PFOA         | Boehmite        | Capacity in $\mu\text{g}/\text{m}^2$ | 0.633          |                              |
| TFA          |                 |                                      | 1.91           |                              |
| PFPrA        |                 |                                      | 1.61           |                              |
| PFBA         |                 |                                      | 0.99           |                              |

|        |        |                                               |      |                               |
|--------|--------|-----------------------------------------------|------|-------------------------------|
| PFPeA  |        |                                               | 1.10 |                               |
| PFHxA  |        |                                               | 1.13 |                               |
| PFHpA  |        |                                               | 1.26 |                               |
| PFOA   | Sludge | Freundlich sorption coefficient (log $K_f$ )  | 1.45 | Zhang et al., 2013 (ref. 145) |
| PFNA   |        |                                               | 1.85 |                               |
| PFDA   |        |                                               | 2.22 |                               |
| PFUnA  |        |                                               | 2.60 |                               |
| PFDoA  |        |                                               | 2.86 |                               |
| PFTA   |        |                                               | 2.79 |                               |
| PFBS   |        |                                               | 1.32 |                               |
| PFHxS  |        |                                               | 1.59 |                               |
| PFOS   |        |                                               | 2.06 |                               |
| PFBA   |        |                                               |      |                               |
| PFPeA  |        |                                               | 0.7  |                               |
| PFHxA  |        |                                               | 1.2  |                               |
| PFHpA  |        |                                               | 1.3  |                               |
| PFOA   |        |                                               | 1.7  |                               |
| PFNA   |        |                                               | 2.2  |                               |
| PFDA   | Soil   | Partition coefficient (log $K_{oc}$ ) in mL/g | 3.1  |                               |
| PFUnDA |        |                                               | 4.4  |                               |
| PFDoDA |        |                                               | 4.7  |                               |

|        |          |       |                                    |
|--------|----------|-------|------------------------------------|
| PFTeDA |          | 4.3   |                                    |
| FOSA   |          | 4.3   |                                    |
| PFBS   |          | 5.0   |                                    |
| PFHxS  |          | 1.2   |                                    |
| PFOS   |          | 2.5   |                                    |
|        |          | 4.5   |                                    |
| PFBS   | GAC      | 2.97  | Söregård et al.<br>2020 (ref. 119) |
|        | PAC      | 4.88  |                                    |
|        | Soil     | 0.64  |                                    |
|        | Sludge   | -0.77 |                                    |
|        | Minerals | 0.42  |                                    |
|        | Sediment | 0.25  |                                    |
|        | Other    | -1.05 |                                    |
| PFHxS  | GAC      | 5.18  |                                    |
|        | PAC      | 5.09  |                                    |
|        | Soil     | -0.63 |                                    |
|        | Sludge   | 0.03  |                                    |
|        | Minerals | -0.18 |                                    |
|        | Sediment | -0.29 |                                    |
|        | Other    | -1.31 |                                    |
| PFOS   | GAC      | 4.33  |                                    |
|        | PAC      | 5.19  |                                    |
|        | Soil     | 0.13  |                                    |
|        | Sludge   | 0.74  |                                    |
|        | Minerals | -0.13 |                                    |
|        | Sediment | 0.06  |                                    |
|        | Other    | -0.30 |                                    |
|        | GAC      | 3.08  |                                    |
| PFBA   | PAC      | 3.66  |                                    |
|        | Soil     | 0.59  |                                    |
|        | Sludge   | -0.14 |                                    |
|        | Minerals | -0.46 |                                    |
|        | Sediment | -0.10 |                                    |

---

|       |          |       |
|-------|----------|-------|
|       | Other    | -0.46 |
| PFPeA | GAC      | 3.51  |
|       | PAC      | 3.45  |
|       | Soil     | 0.75  |
|       | Sludge   | -0.41 |
|       | Minerals | -0.92 |
|       | Sediment | -0.78 |
|       | Other    | -0.56 |
| PFHxA | GAC      | 4.10  |
|       | PAC      | 3.09  |
|       | Soil     | 3.71  |
|       | Sludge   | -0.12 |
|       | Minerals | -0.35 |
|       | Sediment | -0.14 |
|       | Other    | 0.76  |
| PFOA  | GAC      | 3.43  |
|       | PAC      | 3.49  |
|       | Soil     | 0.732 |
|       | Sludge   | -0.63 |
|       | Minerals | -0.14 |
|       | Sediment | -0.83 |
|       | Other    | 0.65  |
| PFNA  | GAC      | 3.98  |
|       | PAC      | 4.34  |
|       | Soil     | -0.63 |
|       | Sludge   | -0.61 |
|       | Minerals | -0.86 |
|       | Sediment | -0.77 |
|       | Other    | -1.14 |
| PFDA  | GAC      | 4.34  |
|       | PAC      | 2.02  |
|       | Soil     | -0.18 |
|       | Sludge   | -0.59 |
|       | Minerals | -0.25 |
|       | Sediment | -4.66 |
|       | Other    | -0.65 |

---

|        |          |       |
|--------|----------|-------|
| PFUnDA | GAC      | 4.16  |
|        | PAC      | 4.41  |
|        | Soil     | -0.18 |
|        | Sludge   | -1.27 |
|        | Minerals | 0.66  |
|        | Sediment | -0.24 |
|        | Other    | -1.24 |
| PFDoDa | GAC      | 4.36  |
|        | PAC      | 4.71  |
|        | Soil     | 0.14  |
|        | Sludge   | 0.68  |
|        | Minerals | -0.80 |
|        | Sediment | -0.24 |
|        | Other    | -4.97 |
| PFTeDA | GAC      | 4.06  |
|        | PAC      | 4.95  |
|        | Soil     | 0.35  |
|        | Sludge   | -0.87 |
|        | Minerals | -0.16 |
|        | Sediment | -0.93 |
|        | Other    | -7.45 |
| PFHxDA | GAC      | 3.66  |
|        | PAC      | 4.56  |
|        | Soil     | -0.87 |
|        | Sludge   | -0.80 |
|        | Minerals | 0.46  |
|        | Sediment | -0.40 |
|        | Other    | 0.19  |
| PFDoDA | GAC      | 2.73  |
|        | PAC      | 2.97  |
|        | Soil     | 1.40  |
|        | Sludge   | 1.48  |
|        | Minerals | 0.72  |
|        | Sediment | 1.48  |
|        | Other    | 2.21  |
| FOSA   | GAC      | 2.87  |
|        | PAC      | 3.27  |
|        | Soil     | 1.77  |
|        | Sludge   | 1.96  |



|          |                        |       |                                   |
|----------|------------------------|-------|-----------------------------------|
|          | Minerals               | 1.75  |                                   |
|          | Sediment               | 1.79  |                                   |
|          | Other                  | 2.52  |                                   |
| 6:2 FTSA | GAC                    | 2.92  |                                   |
|          | PAC                    | 2.79  |                                   |
|          | Soil                   | 0.86  |                                   |
|          | Sludge                 | 0.87  |                                   |
|          | Minerals               | 0.76  |                                   |
|          | Sediment               | 0.40  |                                   |
|          | Other                  | 0.24  |                                   |
| 8:2 FTSA | GAC                    | 3.68  |                                   |
|          | PAC                    | 3.60  |                                   |
|          | Soil                   | -0.50 |                                   |
|          | Sludge                 | 0.41  |                                   |
|          | Minerals               | -1.27 |                                   |
|          | Sediment               | -0.23 |                                   |
|          | Other                  | -0.44 |                                   |
| PFOS     |                        | 5.81  | Chen et al., 2012<br>(ref. 47)    |
|          |                        | 6.11  |                                   |
|          | Sediment               | 6.4   |                                   |
|          |                        | 6.67  |                                   |
| PFOA     | Iron oxide<br>surfaces | 11.7  |                                   |
|          |                        | 9.99  |                                   |
|          |                        | 7.17  | Gao & Chorover,<br>2012 (ref. 68) |
| PFOS     | Iron oxide<br>surfaces | 5     |                                   |

|       |                           |                           |        |                                 |
|-------|---------------------------|---------------------------|--------|---------------------------------|
|       |                           |                           | 7.41   |                                 |
| PFOA  |                           |                           | 5.81   | Xiao et al., 2012<br>(ref. 133) |
| PFNA  |                           |                           | 6.11   |                                 |
| PFDA  | Resins                    | Log $K_D$ in L/Kg         | 6.40   |                                 |
| PFOA  |                           |                           | 6.67   |                                 |
| PFOA  | Montmorillonite-carnitine | Langmuir constant $K_D$   | 3.70E5 | Wang et al., 2021<br>(ref. 127) |
| PFOA  | Montmorillonite-choline   | Langmuir constant $K_D$   | 4.76E5 |                                 |
| PFOS  | Montmorillonite-carnitine | Langmuir constant $K_D$   | 5.25E5 |                                 |
| PFOS  | Montmorillonite-choline   | Langmuir constant $K_D$   | 3.92E5 |                                 |
| Gen X | Montmorillonite-carnitine | Freundlich constant $K_f$ | 2.12E4 |                                 |
| PFBS  | Montmorillonite-choline   | Freundlich constant $K_f$ | 9.04E4 |                                 |
|       |                           |                           |        |                                 |

**Table S3.** List of all adsorbents included under “Other” category

**Sorbents under “Other” category**

Polyethylenimine-Functionalized Cellulose Microcrystals (PEI-f-CMC)

Oil derived black carbon

Biochar

Hexadecyltrimethylammonium bromide modified montmorillonite (HDTMAB-Mt)

Maize straw and willow-derived Chars (MSWDC)

Maize straw- origin ash (MA)

Permanently confined micelle arrays (PCMAs)

swellable organically modified silica (SOS)

Polyaniline nanotubes

Magnetic mesoporous carbon nitride

Quaternized cotton

Polyaniline emeraldine salt nanotubes

Hydrotalcite

Aminated rice husk

Nano starch-stabilized magnetite

Modified hexagonal mesoporous silicas (HMS)

|                                                                                                    |
|----------------------------------------------------------------------------------------------------|
| Ash maize                                                                                          |
| Carboxymethyl- $\beta$ -cyclodextrin sodium salt (CMCDSS)                                          |
| Nanofibrous membranes                                                                              |
| Organic and inorganic waste products                                                               |
| Environmentally Friendly $\beta$ -Cyclodextrin-Ionic Liquid Polyurethane-Modified Magnetic Sorbent |
| Fe <sub>3</sub> O <sub>4</sub> /SiO <sub>2</sub> magnetic nanoparticles with C18/NH <sub>2</sub>   |
| Poly ethylene glycol diacrylate                                                                    |
| Polymer Supported Carbon                                                                           |
| Chitosan-ethylene glycol hydrogel                                                                  |
| Leaf biomass ( <i>Vitis vinifera</i> )                                                             |
| Few-layered porous graphite (FPG)                                                                  |
